# Supplementary material for: Wearable Triboelectric Nanogenerator with Ground-Coupled Electrode for Biomechanical Energy Harvesting and Sensing
Source: MDPI journal article supplement (doi:10.3390/bios13050548), 2023-05-15
Supplement: s1 [file s1]

Supplementary Materials

# Wearable Triboelectric Nanogenerator with Ground-Coupled Electrode for Biomechanical Energy Harvesting and Sensing

Kangyu Su <sup>†</sup>, Xiaobo Lin <sup>†</sup>, Zhangwei Liu, Yun Tian, Zhengchun Peng and Bo Meng <sup>\*</sup>

Key Laboratory of Optoelectronic Devices and Systems of Ministry of Education and Guangdong Province, College of Physics and Optoelectronic Engineering, Shenzhen University, Shenzhen 518060, China; zcpeng@szu.edu.cn (Z.P.)

<sup>\*</sup> Correspondence: bomeng@szu.edu.cn

<sup>†</sup> These authors contributed equally to this work.

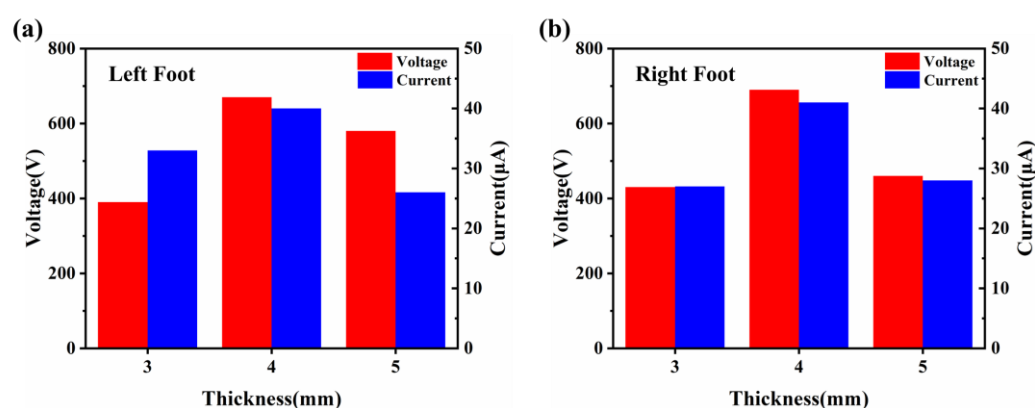

**Figure S1.** Output performance comparison of the wearable TENG using EVA triboelectric layers with different thicknesses. (a) Output comparison of the wearable TENG worn on the left foot. (b) Output comparison of the wearable TENG worn on the right foot.

**Citation:** Su, K.; Lin, X.; Liu, Z.; Tian, Y.; Peng, Z.; Meng, B. Wearable Triboelectric Nanogenerator with Ground-Coupled Electrode for Biomechanical Energy Harvesting and Sensing. *Biosensors* **2023**, *13*, 548. <https://doi.org/10.3390/bios13050548>

Received: 30 March 2023

Revised: 10 May 2023

Accepted: 11 May 2023

Published: 15 May 2023

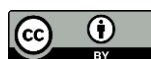

**Copyright:** © 2023 by the authors. Licensee MDPI, Basel, Switzerland. This article is an open access article distributed under the terms and conditions of the Creative Commons Attribution (CC BY) license (<https://creativecommons.org/licenses/by/4.0/>).

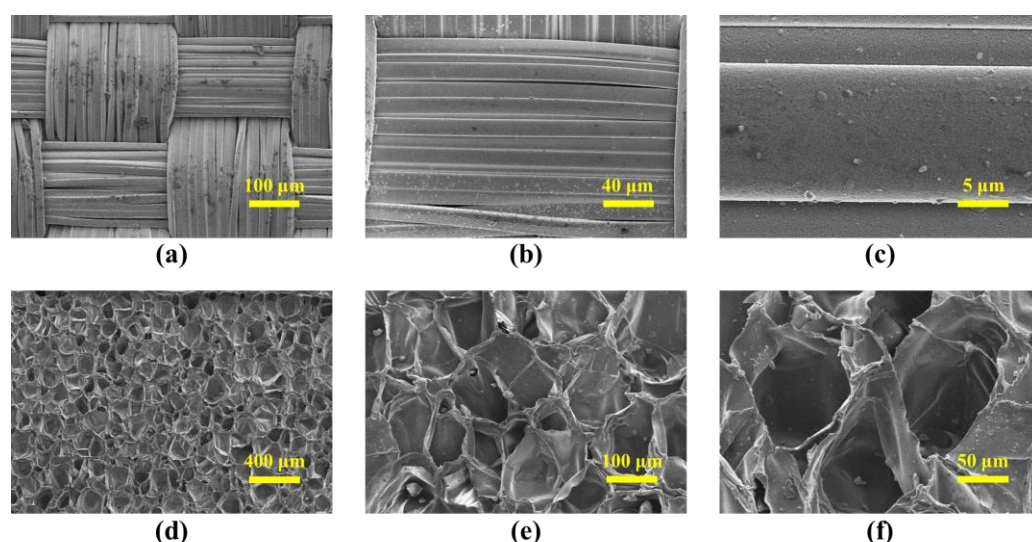

**Figure S2.** SEM images of the conductive textile and the EVA foam. (a-c) SEM images in different scales of the conductive textile. (d-f) SEM images in different scales of the EVA foam.

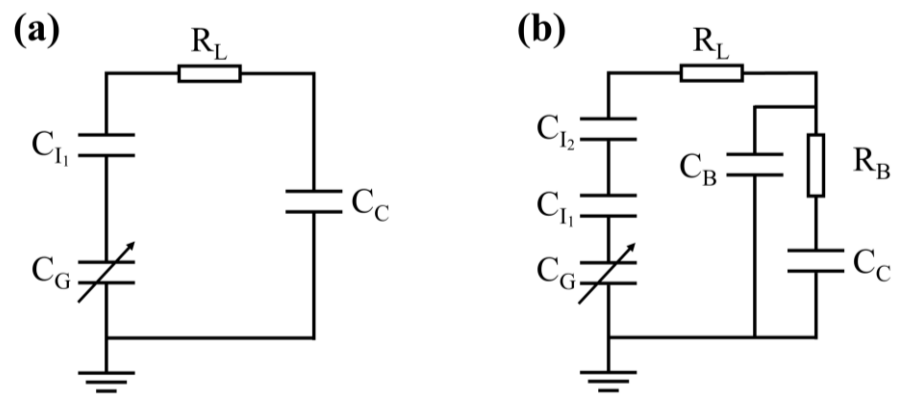

**Figure S3.** Schematic of the equivalent circuits of the wearable TENG. (a) Equivalent circuit diagram of the TENG with an external wire. (b) Equivalent circuit diagram of the TENG with human body as a natural conductor.

The equivalent circuit of the device can be simplified to **Figure S3**. In which  $R_L$  corresponds to the load resistor,  $C_G$  represents the capacitance between the friction surface of sole and the ground,  $C_C$  represents the capacitance between ground-coupled electrode and ground,  $C_{I1}$  represents the capacitance between the TENG's electrode and the friction surface,  $C_{I2}$  is the capacitance between the electrodes inside and outside the shoe (when human body is used as a natural conductor instead of an external wire),  $C_B$  is the capacitance between the ground and human body, and  $R_B$  is the resistor of human body. When one foot keeps contact with the ground, the device on this foot forms a ground-coupled electrode. And the capacitance between the electrode and ground ( $C_C$ ) is much larger than the capacitance in the state where the foot is suspended. Therefore, it provides a greater potential difference for charge transfer.

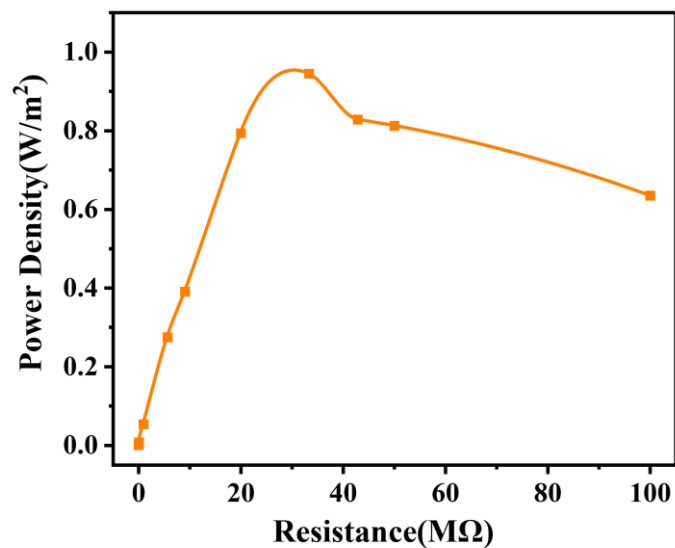

**Figure S4.** Power density curve under different external load resistance.

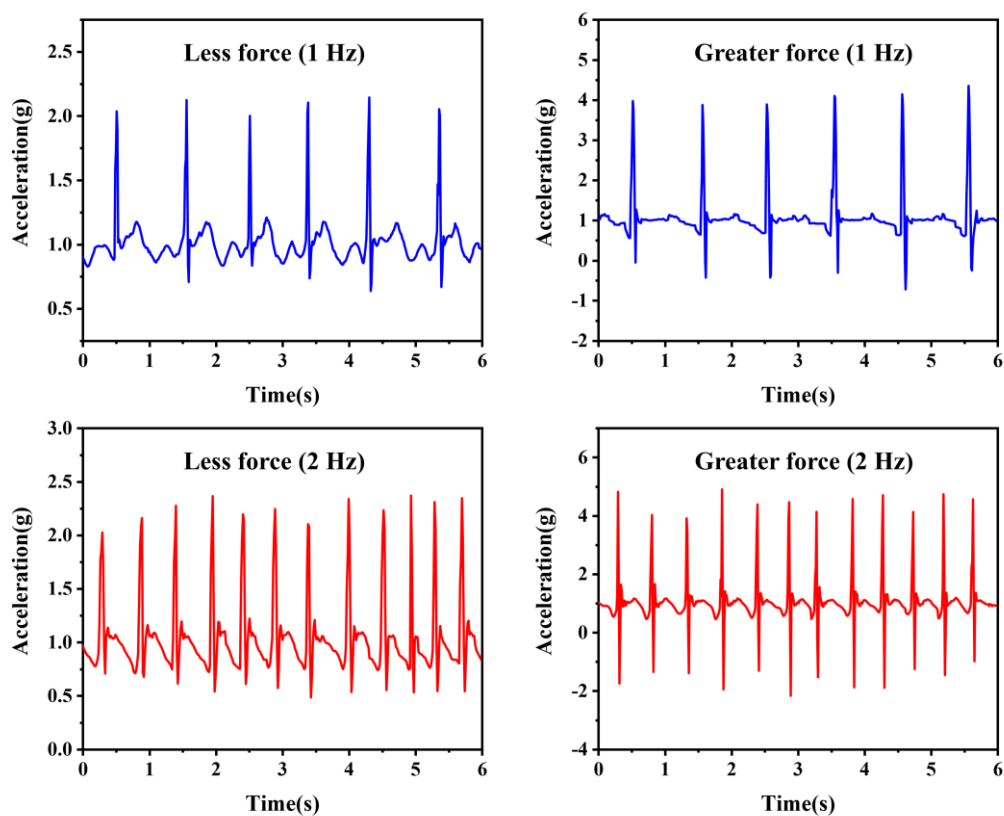

Figure S5. Acceleration curve of the tester's foot during different motions.

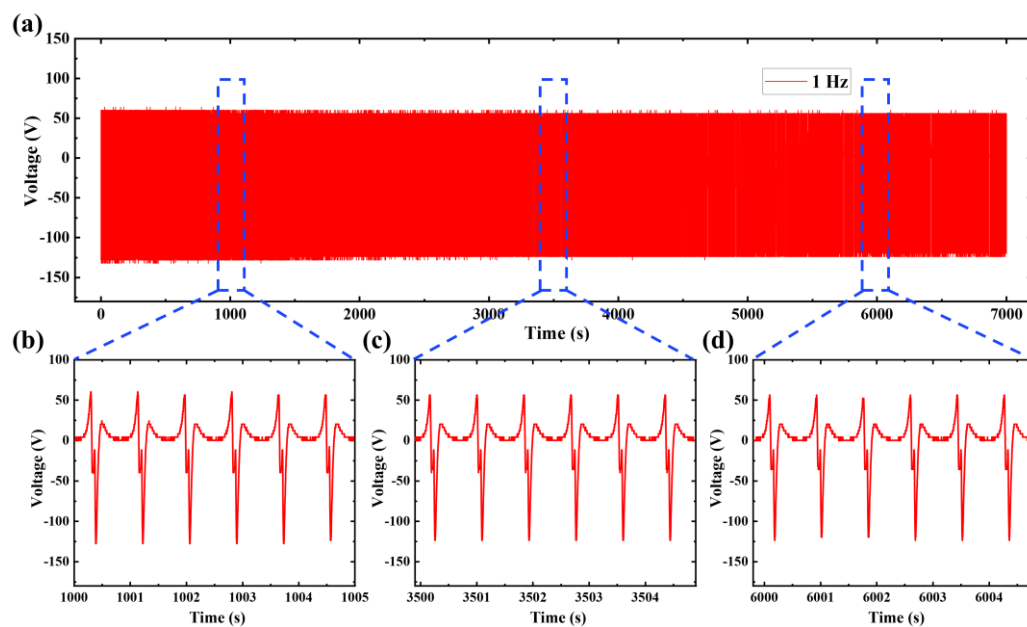

Figure S6. Durability test of the TENG.

**Table S1.** Comparison of different TENG devices for biomechanical energy harvesting and human motion monitoring.

| Materials                                              | Structural Features                                        | Output Performance      | Location of Installation         | Applications                                                |                  |
|--------------------------------------------------------|------------------------------------------------------------|-------------------------|----------------------------------|-------------------------------------------------------------|------------------|
| rubber and physiological saline                        | rubber surface nanostructures                              | 0.33 mW/m <sup>2</sup>  | calf and other human body parts  | gait pattern detection and identity recognition             | [38]             |
| laser-induced graphene foam                            | 3D porous network structure                                | 92.1 mW/m <sup>2</sup>  | chest, finger, wrist, shoe soles | motion monitoring and health monitoring                     | [42]             |
| PTFE and PET                                           | modified ratchet-pawl structure                            | 22.004 W/m <sup>3</sup> | lower-limb                       | gait abnormality detection and lower-limb motion monitoring | [43]             |
| copper-nickel fabric and BaTiO <sub>3</sub> doped PDMS | multi-layer corrugated structure                           | 4860 mW/m <sup>2</sup>  | Insoles and carpets              | people stream monitoring and falls detection                | [41]             |
| PAN@ZIF-8 nanofibers and PTFE                          | rough surface supporting structure                         | 1910 mW/m <sup>2</sup>  | home appliances                  | monitor and control home appliances                         | [44]             |
| chitosan and silk fibroin film, PTFE                   | sandwich structure                                         | 268.8 mW/m <sup>2</sup> | shoe soles and human body parts  | human motion monitoring                                     | [34]             |
| PDMS and PEDOT:PSS                                     | electrode with wrinkled surface structure                  | 4.06 mW/m <sup>2</sup>  | elbow and joint                  | bending angle of elbow and joint monitoring                 | [45]             |
| P(VDF-TrFE) and PA66                                   | woven fabric structure                                     | 93 mW/m <sup>2</sup>    | gloves                           | finger movements detection                                  | [46]             |
| PTFE and aluminum foil                                 | concave-convex supporting structure                        | 0.686 mW/m <sup>2</sup> | shoe heels                       | gait and stability of multiple human motions monitoring     | [47]             |
| PEDOT:PSS and PZT                                      | piezoelectric and triboelectric hybrid structure           | 110 mW/m <sup>2</sup>   | socks                            | walking pattern recognition and motion tracking             | [48]             |
| Kevlar fiber and conductive shear-stiffening gel       | protective and impact kinetic energy-harvesting properties | 5.3 mW/m <sup>2</sup>   | Elbow, knee,                     | sports protection and foot motion recognition               | [49]             |
| EVA and conductive textile                             | ground-coupled electrode                                   | 940 mW/m <sup>2</sup>   | shoe soles                       | human gait recognition, motion monitoring                   | <b>This Work</b> |

**Supporting Video S1.** The wearable TENG lighting up the LED strip integrated in the shoelace during normal walking.
